# Supplementary material for: From blood to lung tissue: effect of cigarette smoke on DNA methylation and lung function
Source: Springer Nature journal article supplement (doi:10.1186/s12931-018-0904-y), 2018-11-03
Supplement: MOESM5 [file 16249114]

Additional file 5: Overview results eQTM analysis

| CpG name   | Beta    | SE     | P-value  | Bonferroni | Chromosome | bp_meth   | bp_Gene   | Annotation CpG | Probe            | Genename |
|------------|---------|--------|----------|------------|------------|-----------|-----------|----------------|------------------|----------|
| cg05575921 | -0.1039 | 0.0184 | 1.80E-08 | 9.18E-07   | 5          | 373378    | 357290    | AHRR           | 100155403_TGI_at | AHRR     |
| cg21161138 | -0.1787 | 0.0348 | 2.74E-07 | 1.45E-05   | 5          | 399360    | 357290    | AHRR           | 100155403_TGI_at | AHRR     |
| cg05951221 | 0.0432  | 0.0096 | 6.66E-06 | 3.53E-04   | 2          | 233284402 | 233824955 |                | 100136522_TGI_at | ATG16L1  |
| cg21566642 | 0.0420  | 0.0098 | 1.64E-05 | 8.71E-04   | 2          | 233284661 | 233824955 |                | 100136522_TGI_at | ATG16L1  |
| cg05951221 | -0.0469 | 0.0122 | 1.19E-04 | 6.29E-03   | 2          | 233284402 | 232534536 |                | 100140869_TGI_at | DIS3L2   |
| cg06126421 | -0.1529 | 0.0380 | 5.68E-05 | 7.27E-03   | 6          | 30720080  | 31059463  |                | 100159175_TGI_at | MUC21    |
| cg21566642 | -0.0417 | 0.0123 | 6.84E-04 | 3.63E-02   | 2          | 233284661 | 232534536 |                | 100140869_TGI_at | DIS3L2   |
| cg06126421 | -0.0188 | 0.0053 | 3.57E-04 | 4.58E-02   | 6          | 30720080  | 30796135  |                | 100300978_TGI_at | TUBB     |
| cg06126421 | -0.1176 | 0.0340 | 5.37E-04 | 6.87E-02   | 6          | 30720080  | 31059528  |                | 100309111_TGI_at | MUC21    |
| cg05951221 | 0.0311  | 0.0097 | 1.31E-03 | 6.96E-02   | 2          | 233284402 | 232305390 |                | 100152901_TGI_at | PDE6D    |
| cg05575921 | -0.0137 | 0.0043 | 1.57E-03 | 8.01E-02   | 5          | 373378    | 1306286   | AHRR           | 100144642_TGI_at | TERT     |
| cg21566642 | 0.0304  | 0.0099 | 2.22E-03 | 1.18E-01   | 2          | 233284661 | 232305390 |                | 100152901_TGI_at | PDE6D    |
| cg21161138 | -0.0433 | 0.0144 | 2.56E-03 | 1.35E-01   | 5          | 399360    | 474045    | AHRR           | 100309585_TGI_at | AHRR     |
| cg05575921 | -0.0102 | 0.0034 | 2.74E-03 | 1.40E-01   | 5          | 373378    | 654859    | AHRR           | 100152132_TGI_at |          |
| cg05575921 | -0.0115 | 0.0039 | 3.03E-03 | 1.55E-01   | 5          | 373378    | 357298    | AHRR           | 100162325_TGI_at | AHRR     |
| cg06126421 | -0.0254 | 0.0080 | 1.52E-03 | 1.94E-01   | 6          | 30720080  | 31691011  |                | 100151160_TGI_at | AIF1     |
| cg05951221 | -0.0239 | 0.0086 | 5.64E-03 | 2.99E-01   | 2          | 233284402 | 232959742 |                | 100124762_TGI_at | ECEL1P2  |
| cg05575921 | -0.0146 | 0.0053 | 6.23E-03 | 3.18E-01   | 5          | 373378    | 1278469   | AHRR           | 100144282_TGI_at | SLC6A18  |
| cg21566642 | 0.0435  | 0.0159 | 6.25E-03 | 3.31E-01   | 2          | 233284661 | 234147014 |                | 100145437_TGI_at |          |
| cg05951221 | -0.0314 | 0.0116 | 6.89E-03 | 3.65E-01   | 2          | 233284402 | 232534637 |                | 100309749_TGI_at | DIS3L2   |
| cg05575921 | 0.0334  | 0.0126 | 7.94E-03 | 4.05E-01   | 5          | 373378    | 254500    | AHRR           | 100142366_TGI_at |          |
| cg21161138 | -0.0283 | 0.0107 | 8.36E-03 | 4.43E-01   | 5          | 399360    | 357291    | AHRR           | 100138821_TGI_at | AHRR     |
| cg05951221 | -0.0736 | 0.0284 | 9.63E-03 | 5.10E-01   | 2          | 233284402 | 233206567 |                | 100156680_TGI_at | EFHD1    |
| cg05575921 | 0.0224  | 0.0087 | 1.01E-02 | 5.15E-01   | 5          | 373378    | 237421    | AHRR           | 100126945_TGI_at | PLEKHG4B |
| cg21566642 | -0.0303 | 0.0118 | 1.05E-02 | 5.58E-01   | 2          | 233284661 | 232534637 |                | 100309749_TGI_at | DIS3L2   |
| cg05951221 | 0.0412  | 0.0161 | 1.06E-02 | 5.60E-01   | 2          | 233284402 | 234147014 |                | 100145437_TGI_at |          |
| cg05575921 | -0.0105 | 0.0042 | 1.17E-02 | 5.95E-01   | 5          | 373378    | 923403    | AHRR           | 100310904_TGI_at | BRD9     |
| cg06126421 | -0.0256 | 0.0092 | 5.37E-03 | 6.87E-01   | 6          | 30720080  | 31623350  |                | 100152647_TGI_at | NFKBIL1  |
| cg05575921 | -0.0194 | 0.0079 | 1.41E-02 | 7.17E-01   | 5          | 373378    | 474045    | AHRR           | 100309585_TGI_at | AHRR     |
| cg05575921 | -0.0124 | 0.0050 | 1.41E-02 | 7.22E-01   | 5          | 373378    | 495578    | AHRR           | 100146413_TGI_at |          |

| CpG name   | Beta    | SE     | P-value  | Bonferroni | Chromosome | bp_meth   | bp_Gene   | Annotation CpG | Probe            | Genename |
|------------|---------|--------|----------|------------|------------|-----------|-----------|----------------|------------------|----------|
| cg21566642 | -0.0687 | 0.0279 | 1.37E-02 | 7.25E-01   | 2          | 233284661 | 233206567 |                | 100156680_TGI_at | EFHD1    |
| cg05951221 | -0.0269 | 0.0109 | 1.37E-02 | 7.29E-01   | 2          | 233284402 | 233029076 |                | 100157259_TGI_at | ALPI     |
| cg06126421 | -0.0189 | 0.0069 | 6.04E-03 | 7.73E-01   | 6          | 30720080  | 30050870  |                | 100132949_TGI_at | HCG9     |
| cg06126421 | 0.0497  | 0.0182 | 6.46E-03 | 8.27E-01   | 6          | 30720080  | 29867662  |                | 100141210_TGI_at |          |
| cg06126421 | 0.0398  | 0.0147 | 6.78E-03 | 8.68E-01   | 6          | 30720080  | 31538937  |                | 100144394_TGI_at | HCP5     |
| cg05575921 | -0.0157 | 0.0067 | 1.91E-02 | 9.74E-01   | 5          | 373378    | 357291    | AHRR           | 100138821_TGI_at | AHRR     |
| cg05575921 | -0.0112 | 0.0049 | 2.18E-02 | 1          | 5          | 373378    | 1057830   | AHRR           | 100162877_TGI_at |          |
| cg05575921 | -0.0095 | 0.0046 | 3.73E-02 | 1          | 5          | 373378    | 420579    | AHRR           | 100132989_TGI_at | AHRR     |
| cg05575921 | -0.0120 | 0.0060 | 4.51E-02 | 1          | 5          | 373378    | 1163893   | AHRR           | 100129229_TGI_at |          |
| cg05575921 | -0.0092 | 0.0048 | 5.49E-02 | 1          | 5          | 373378    | 248892    | AHRR           | 100148989_TGI_at |          |
| cg05575921 | 0.0333  | 0.0177 | 5.98E-02 | 1          | 5          | 373378    | 946003    | AHRR           | 100151667_TGI_at | TRIP13   |
| cg05575921 | -0.0106 | 0.0057 | 6.03E-02 | 1          | 5          | 373378    | 496333    | AHRR           | 100137677_TGI_at | EXOC3    |
| cg05575921 | -0.0168 | 0.0097 | 8.30E-02 | 1          | 5          | 373378    | 136266    | AHRR           | 100158534_TGI_at |          |
| cg05575921 | -0.0076 | 0.0046 | 1.01E-01 | 1          | 5          | 373378    | 1032479   | AHRR           | 100153219_TGI_at |          |
| cg05575921 | 0.0235  | 0.0150 | 1.17E-01 | 1          | 5          | 373378    | 713890    | AHRR           | 100313551_TGI_at | TPPP     |
| cg05575921 | -0.0079 | 0.0051 | 1.25E-01 | 1          | 5          | 373378    | 849287    | AHRR           | 100307772_TGI_at | ZDHHC11  |
| cg05575921 | -0.0146 | 0.0100 | 1.44E-01 | 1          | 5          | 373378    | 532246    | AHRR           | 100123914_TGI_at |          |
| cg05575921 | -0.0050 | 0.0035 | 1.49E-01 | 1          | 5          | 373378    | 271355    | AHRR           | 100302759_TGI_at | SDHA     |
| cg05575921 | -0.0067 | 0.0047 | 1.55E-01 | 1          | 5          | 373378    | 525126    | AHRR           | 100307857_TGI_at |          |
| cg05575921 | 0.0114  | 0.0085 | 1.80E-01 | 1          | 5          | 373378    | 237421    | AHRR           | 100306701_TGI_at | PLEKHG4B |
| cg05575921 | -0.0116 | 0.0090 | 2.00E-01 | 1          | 5          | 373378    | 1277671   | AHRR           | 100125947_TGI_at | SLC6A19  |
| cg05575921 | -0.0130 | 0.0106 | 2.21E-01 | 1          | 5          | 373378    | 1062167   | AHRR           | 100154736_TGI_at | NKD2     |
| cg05575921 | 0.0169  | 0.0140 | 2.28E-01 | 1          | 5          | 373378    | 713890    | AHRR           | 100144166_TGI_at | TPPP     |
| cg05575921 | -0.0118 | 0.0102 | 2.46E-01 | 1          | 5          | 373378    | 944761    | AHRR           | 100304823_TGI_at | BRD9     |
| cg05575921 | -0.0064 | 0.0056 | 2.53E-01 | 1          | 5          | 373378    | 327872    | AHRR           | 100131641_TGI_at | PDCD6    |
| cg05575921 | -0.0066 | 0.0058 | 2.56E-01 | 1          | 5          | 373378    | 244625    | AHRR           | 100123951_TGI_at |          |
| cg05575921 | -0.0116 | 0.0104 | 2.64E-01 | 1          | 5          | 373378    | 1062076   | AHRR           | 100309999_TGI_at | NKD2     |
| cg05575921 | -0.0044 | 0.0042 | 2.91E-01 | 1          | 5          | 373378    | 1254765   | AHRR           | 100140783_TGI_at | SLC6A19  |
| cg05575921 | 0.0064  | 0.0063 | 3.11E-01 | 1          | 5          | 373378    | 1103488   | AHRR           | 100126447_TGI_at | SLC12A7  |
| cg05575921 | -0.0046 | 0.0049 | 3.44E-01 | 1          | 5          | 373378    | 193372    | AHRR           | 100138179_TGI_at | PLEKHG4B |
| cg05575921 | 0.0036  | 0.0039 | 3.55E-01 | 1          | 5          | 373378    | 513536    | AHRR           | 100131916_TGI_at |          |
| cg05575921 | -0.0219 | 0.0251 | 3.84E-01 | 1          | 5          | 373378    | 1226255   | AHRR           | 100311848_TGI_at |          |

| CpG name   | Beta    | SE     | P-value  | Bonferroni | Chromosome | bp_meth   | bp_Gene   | Annotation CpG | Probe            | Genename |
|------------|---------|--------|----------|------------|------------|-----------|-----------|----------------|------------------|----------|
| cg05575921 | -0.0037 | 0.0044 | 4.00E-01 | 1          | 5          | 373378    | 1254709   | AHRR           | 100125143_TGI_at | SLC6A19  |
| cg05575921 | 0.0168  | 0.0202 | 4.06E-01 | 1          | 5          | 373378    | 848721    | AHRR           | 100133783_TGI_at | ZDHHC11  |
| cg05575921 | 0.0149  | 0.0181 | 4.09E-01 | 1          | 5          | 373378    | 763474    | AHRR           | 100300181_TGI_at | ZDHHC11  |
| cg05575921 | -0.0045 | 0.0056 | 4.24E-01 | 1          | 5          | 373378    | 193680    | AHRR           | 100155610_TGI_at | PLEKHG4B |
| cg05575921 | -0.0025 | 0.0036 | 4.82E-01 | 1          | 5          | 373378    | 526424    | AHRR           | 100150375_TGI_at | SLC9A3   |
| cg05575921 | -0.0027 | 0.0041 | 5.02E-01 | 1          | 5          | 373378    | 665404    | AHRR           | 100151246_TGI_at | CEP72    |
| cg05575921 | 0.0017  | 0.0038 | 6.55E-01 | 1          | 5          | 373378    | 324777    | AHRR           | 100305370_TGI_at | PDCD6    |
| cg05575921 | 0.0016  | 0.0085 | 8.47E-01 | 1          | 5          | 373378    | 523626    | AHRR           | 100304150_TGI_at |          |
| cg05575921 | 0.0011  | 0.0072 | 8.77E-01 | 1          | 5          | 373378    | 523626    | AHRR           | 100141396_TGI_at |          |
| cg05575921 | 0.0006  | 0.0046 | 8.90E-01 | 1          | 5          | 373378    | 277519    | AHRR           | 100304547_TGI_at | SDHA     |
| cg05575921 | 0.0007  | 0.0064 | 9.14E-01 | 1          | 5          | 373378    | 327872    | AHRR           | 100312117_TGI_at | PDCD6    |
| cg05575921 | -0.0009 | 0.0097 | 9.26E-01 | 1          | 5          | 373378    | 258073    | AHRR           | 100311673_TGI_at | CCDC127  |
| cg05575921 | 0.0010  | 0.0112 | 9.30E-01 | 1          | 5          | 373378    | 257874    | AHRR           | 100127701_TGI_at | CCDC127  |
| cg05575921 | -0.0001 | 0.0047 | 9.78E-01 | 1          | 5          | 373378    | 1272703   | AHRR           | 100124001_TGI_at | SLC6A19  |
| cg05951221 | -0.0302 | 0.0145 | 3.73E-02 | 1          | 2          | 233284402 | 232979795 |                | 100142619_TGI_at | ALPPL2   |
| cg05951221 | -0.0320 | 0.0167 | 5.52E-02 | 1          | 2          | 233284402 | 233443237 |                | 100148559_TGI_at | C2orf82  |
| cg05951221 | -0.0152 | 0.0083 | 6.69E-02 | 1          | 2          | 233284402 | 233448752 |                | 100133682_TGI_at | C2orf82  |
| cg05951221 | 0.0333  | 0.0191 | 8.17E-02 | 1          | 2          | 233284402 | 233270258 |                | 100302206_TGI_at | GIGYF2   |
| cg05951221 | -0.0223 | 0.0131 | 8.92E-02 | 1          | 2          | 233284402 | 232990987 |                | 100146285_TGI_at |          |
| cg05951221 | -0.0311 | 0.0186 | 9.50E-02 | 1          | 2          | 233284402 | 233254953 |                | 100303862_TGI_at | EFHD1    |
| cg05951221 | 0.0316  | 0.0204 | 1.22E-01 | 1          | 2          | 233284402 | 233742741 |                | 100123878_TGI_at | INPP5D   |
| cg05951221 | -0.0121 | 0.0085 | 1.56E-01 | 1          | 2          | 233284402 | 233033426 |                | 100130494_TGI_at |          |
| cg05951221 | 0.0253  | 0.0180 | 1.61E-01 | 1          | 2          | 233284402 | 234058990 |                | 100135825_TGI_at | USP40    |
| cg05951221 | -0.0134 | 0.0101 | 1.85E-01 | 1          | 2          | 233284402 | 232925503 |                | 100157308_TGI_at |          |
| cg05951221 | 0.0210  | 0.0163 | 1.99E-01 | 1          | 2          | 233284402 | 233633311 |                | 100157967_TGI_at | INPP5D   |
| cg05951221 | 0.0181  | 0.0142 | 2.04E-01 | 1          | 2          | 233284402 | 233633311 |                | 100300545_TGI_at | INPP5D   |
| cg05951221 | -0.0123 | 0.0101 | 2.25E-01 | 1          | 2          | 233284402 | 233108610 |                | 100159750_TGI_at | CHRND    |
| cg05951221 | -0.0187 | 0.0160 | 2.44E-01 | 1          | 2          | 233284402 | 233451639 |                | 100138454_TGI_at | NGEF     |
| cg05951221 | -0.0123 | 0.0108 | 2.56E-01 | 1          | 2          | 233284402 | 233099165 |                | 100161687_TGI_at | CHRND    |
| cg05951221 | 0.0094  | 0.0089 | 2.94E-01 | 1          | 2          | 233284402 | 233405810 |                | 100124019_TGI_at | GIGYF2   |
| cg05951221 | 0.0290  | 0.0278 | 2.96E-01 | 1          | 2          | 233284402 | 232382799 |                | 100153985_TGI_at |          |
| cg05951221 | 0.0147  | 0.0147 | 3.19E-01 | 1          | 2          | 233284402 | 233276374 |                | 100304412_TGI_at | GIGYF2   |

| CpG name   | Beta    | SE     | P-value  | Bonferroni | Chromosome | bp_meth   | bp_Gene   | Annotation CpG | Probe            | Genename |
|------------|---------|--------|----------|------------|------------|-----------|-----------|----------------|------------------|----------|
| cg05951221 | -0.0090 | 0.0092 | 3.30E-01 | 1          | 2          | 233284402 | 233585567 |                | 100128184_TGI_at |          |
| cg05951221 | -0.0117 | 0.0125 | 3.46E-01 | 1          | 2          | 233284402 | 233881206 |                | 100127704_TGI_at | SAG      |
| cg05951221 | -0.0086 | 0.0097 | 3.79E-01 | 1          | 2          | 233284402 | 233605625 |                | 100125390_TGI_at | NEU2     |
| cg05951221 | -0.0098 | 0.0114 | 3.93E-01 | 1          | 2          | 233284402 | 232498378 |                | 100144674_TGI_at | NPPC     |
| cg05951221 | -0.0162 | 0.0216 | 4.54E-01 | 1          | 2          | 233284402 | 233339103 |                | 100153794_TGI_at | KCNJ13   |
| cg05951221 | -0.0107 | 0.0160 | 5.05E-01 | 1          | 2          | 233284402 | 233633279 |                | 100308965_TGI_at | INPP5D   |
| cg05951221 | 0.0069  | 0.0106 | 5.14E-01 | 1          | 2          | 233284402 | 232359405 |                | 100124382_TGI_at | COPS7B   |
| cg05951221 | 0.0125  | 0.0203 | 5.38E-01 | 1          | 2          | 233284402 | 232534637 |                | 100162400_TGI_at | DIS3L2   |
| cg05951221 | -0.0061 | 0.0107 | 5.68E-01 | 1          | 2          | 233284402 | 233901986 |                | 100306256_TGI_at | SAG      |
| cg05951221 | -0.0101 | 0.0180 | 5.72E-01 | 1          | 2          | 233284402 | 233123601 |                | 100127022_TGI_at | EIF4E2   |
| cg05951221 | -0.0053 | 0.0096 | 5.77E-01 | 1          | 2          | 233284402 | 233123639 |                | 100308088_TGI_at | EIF4E2   |
| cg05951221 | 0.0061  | 0.0115 | 5.99E-01 | 1          | 2          | 233284402 | 233112680 |                | 100161148_TGI_at | CHRNA3   |
| cg05951221 | -0.0064 | 0.0128 | 6.15E-01 | 1          | 2          | 233284402 | 233123600 |                | 100302691_TGI_at | EIF4E2   |
| cg05951221 | -0.0245 | 0.0515 | 6.34E-01 | 1          | 2          | 233284402 | 232951591 |                | 100302996_TGI_at | ALPP     |
| cg05951221 | -0.0059 | 0.0148 | 6.89E-01 | 1          | 2          | 233284402 | 233139867 |                | 100305783_TGI_at | EIF4E2   |
| cg05951221 | -0.0039 | 0.0105 | 7.11E-01 | 1          | 2          | 233284402 | 234048910 |                | 100128277_TGI_at |          |
| cg05951221 | -0.0034 | 0.0113 | 7.61E-01 | 1          | 2          | 233284402 | 233123600 |                | 100129016_TGI_at | EIF4E2   |
| cg05951221 | 0.0053  | 0.0183 | 7.71E-01 | 1          | 2          | 233284402 | 233270284 |                | 100142158_TGI_at | GIGYF2   |
| cg05951221 | 0.0040  | 0.0160 | 8.01E-01 | 1          | 2          | 233284402 | 233633279 |                | 100149718_TGI_at | INPP5D   |
| cg05951221 | -0.0060 | 0.0263 | 8.20E-01 | 1          | 2          | 233284402 | 233121022 |                | 100134110_TGI_at | TIGD1    |
| cg05951221 | -0.0060 | 0.0311 | 8.46E-01 | 1          | 2          | 233284402 | 233121022 |                | 100301223_TGI_at | TIGD1    |
| cg05951221 | 0.0022  | 0.0115 | 8.49E-01 | 1          | 2          | 233284402 | 233052780 |                | 100151962_TGI_at | ECEL1    |
| cg05951221 | 0.0026  | 0.0162 | 8.75E-01 | 1          | 2          | 233284402 | 232359387 |                | 100312114_TGI_at | COPS7B   |
| cg05951221 | -0.0016 | 0.0104 | 8.81E-01 | 1          | 2          | 233284402 | 233093416 |                | 100142878_TGI_at |          |
| cg05951221 | 0.0016  | 0.0123 | 8.93E-01 | 1          | 2          | 233284402 | 234048904 |                | 100302018_TGI_at | USP40    |
| cg05951221 | -0.0026 | 0.0264 | 9.21E-01 | 1          | 2          | 233284402 | 234041030 |                | 100134859_TGI_at | DGKD     |
| cg05951221 | 0.0004  | 0.0170 | 9.80E-01 | 1          | 2          | 233284402 | 233927891 |                | 100131135_TGI_at | DGKD     |
| cg06126421 | -0.0170 | 0.0065 | 9.16E-03 | 1          | 6          | 30720080  | 31191331  |                | 100141380_TGI_at | CDSN     |
| cg06126421 | 0.0493  | 0.0192 | 1.03E-02 | 1          | 6          | 30720080  | 31430492  |                | 100313880_TGI_at |          |
| cg06126421 | 0.0312  | 0.0124 | 1.17E-02 | 1          | 6          | 30720080  | 30617145  |                | 100134466_TGI_at |          |
| cg06126421 | 0.0331  | 0.0133 | 1.29E-02 | 1          | 6          | 30720080  | 31555731  |                | 100138417_TGI_at |          |
| cg06126421 | 0.0273  | 0.0114 | 1.66E-02 | 1          | 6          | 30720080  | 29799095  |                | 100303129_TGI_at | HLA-F    |

| CpG name   | Beta    | SE     | P-value  | Bonferroni | Chromosome | bp_meth  | bp_Gene  | Annotation CpG | Probe            | Genename     |
|------------|---------|--------|----------|------------|------------|----------|----------|----------------|------------------|--------------|
| cg06126421 | 0.0285  | 0.0122 | 1.91E-02 | 1          | 6          | 30720080 | 29902734 |                | 100160221_TGI_at | HLA-G        |
| cg06126421 | -0.0151 | 0.0065 | 2.05E-02 | 1          | 6          | 30720080 | 30693584 |                | 100155044_TGI_at | MRPS18B      |
| cg06126421 | 0.0200  | 0.0086 | 2.06E-02 | 1          | 6          | 30720080 | 29903802 |                | 100138030_TGI_at | HLA-G        |
| cg06126421 | 0.0196  | 0.0087 | 2.38E-02 | 1          | 6          | 30720080 | 30565499 |                | 100306223_TGI_at | HLA-E        |
| cg06126421 | 0.0370  | 0.0165 | 2.53E-02 | 1          | 6          | 30720080 | 29799189 |                | 100311606_TGI_at | HLA-F        |
| cg06126421 | -0.0124 | 0.0056 | 2.64E-02 | 1          | 6          | 30720080 | 30142910 |                | 100139766_TGI_at | PPP1R11      |
| cg06126421 | -0.0425 | 0.0193 | 2.74E-02 | 1          | 6          | 30720080 | 30146022 |                | 100135776_TGI_at | RNF39        |
| cg06126421 | 0.0295  | 0.0140 | 3.49E-02 | 1          | 6          | 30720080 | 31273577 |                | 100300925_TGI_at | HCG27        |
| cg06126421 | -0.0162 | 0.0077 | 3.49E-02 | 1          | 6          | 30720080 | 30145332 |                | 100132397_TGI_at |              |
| cg06126421 | -0.0167 | 0.0081 | 3.88E-02 | 1          | 6          | 30720080 | 30032417 |                | 100300018_TGI_at |              |
| cg06126421 | 0.0295  | 0.0150 | 4.90E-02 | 1          | 6          | 30720080 | 31546990 |                | 100303796_TGI_at |              |
| cg06126421 | -0.0178 | 0.0091 | 5.01E-02 | 1          | 6          | 30720080 | 30763805 |                | 100125579_TGI_at | NRM          |
| cg06126421 | -0.0242 | 0.0124 | 5.16E-02 | 1          | 6          | 30720080 | 30973994 |                | 100305113_TGI_at | DDR1         |
| cg06126421 | -0.0277 | 0.0143 | 5.17E-02 | 1          | 6          | 30720080 | 31007105 |                | 100125489_TGI_at | SFTA2        |
| cg06126421 | 0.0484  | 0.0253 | 5.58E-02 | 1          | 6          | 30720080 | 31249491 |                | 100304000_TGI_at | PSORS1C3     |
| cg06126421 | -0.0195 | 0.0102 | 5.64E-02 | 1          | 6          | 30720080 | 30959839 |                | 100161807_TGI_at | DDR1         |
| cg06126421 | 0.0384  | 0.0202 | 5.68E-02 | 1          | 6          | 30720080 | 29867662 |                | 100304197_TGI_at |              |
| cg06126421 | -0.0376 | 0.0207 | 6.96E-02 | 1          | 6          | 30720080 | 29847069 |                | 100309580_TGI_at |              |
| cg06126421 | -0.0191 | 0.0112 | 8.86E-02 | 1          | 6          | 30720080 | 31661949 |                | 100149313_TGI_at | LST1         |
| cg06126421 | 0.0263  | 0.0158 | 9.64E-02 | 1          | 6          | 30720080 | 31664650 |                | 100125842_TGI_at | NCR3         |
| cg06126421 | -0.0118 | 0.0072 | 9.97E-02 | 1          | 6          | 30720080 | 30983955 |                | 100147044_TGI_at | GTF2H4       |
| cg06126421 | 0.0350  | 0.0213 | 9.98E-02 | 1          | 6          | 30720080 | 30279550 |                | 100153401_TGI_at | TRIM26       |
| cg06126421 | 0.0120  | 0.0079 | 1.27E-01 | 1          | 6          | 30720080 | 29810784 |                | 100141578_TGI_at | RP3-377H14.5 |
| cg06126421 | -0.0176 | 0.0119 | 1.38E-01 | 1          | 6          | 30720080 | 31218194 |                | 100126937_TGI_at | CCHCR1       |
| cg06126421 | -0.0138 | 0.0097 | 1.57E-01 | 1          | 6          | 30720080 | 30647148 |                | 100313354_TGI_at | ABCF1        |
| cg06126421 | 0.0268  | 0.0190 | 1.60E-01 | 1          | 6          | 30720080 | 29802358 |                | 100311825_TGI_at | RP3-377H14.5 |
| cg06126421 | 0.0271  | 0.0208 | 1.92E-01 | 1          | 6          | 30720080 | 31273577 |                | 100128894_TGI_at | HCG27        |
| cg06126421 | -0.0123 | 0.0095 | 1.94E-01 | 1          | 6          | 30720080 | 31573944 |                | 100161520_TGI_at | MICB         |
| cg06126421 | -0.0335 | 0.0265 | 2.07E-01 | 1          | 6          | 30720080 | 30233436 |                | 100135516_TGI_at | TRIM10       |
| cg06126421 | -0.0144 | 0.0114 | 2.07E-01 | 1          | 6          | 30720080 | 31475540 |                | 100304001_TGI_at |              |
| cg06126421 | -0.0118 | 0.0095 | 2.13E-01 | 1          | 6          | 30720080 | 31711719 |                | 100307012_TGI_at | BAT2         |
| cg06126421 | -0.0118 | 0.0095 | 2.13E-01 | 1          | 6          | 30720080 | 31696428 |                | 100301381_TGI_at | BAT2         |

| CpG name   | Beta    | SE     | P-value  | Bonferroni | Chromosome | bp_meth  | bp_Gene  | Annotation CpG | Probe            | Genename |
|------------|---------|--------|----------|------------|------------|----------|----------|----------------|------------------|----------|
| cg06126421 | 0.0040  | 0.0033 | 2.20E-01 | 1          | 6          | 30720080 | 31605976 |                | 100162740_TGI_at | BAT1     |
| cg06126421 | -0.0131 | 0.0107 | 2.21E-01 | 1          | 6          | 30720080 | 31487031 |                | 100305324_TGI_at |          |
| cg06126421 | -0.0225 | 0.0184 | 2.21E-01 | 1          | 6          | 30720080 | 31470045 |                | 100155331_TGI_at |          |
| cg06126421 | -0.0080 | 0.0066 | 2.26E-01 | 1          | 6          | 30720080 | 30776070 |                | 100155243_TGI_at | MDC1     |
| cg06126421 | -0.0109 | 0.0091 | 2.31E-01 | 1          | 6          | 30720080 | 30647148 |                | 100124255_TGI_at | ABCF1    |
| cg06126421 | 0.0057  | 0.0048 | 2.36E-01 | 1          | 6          | 30720080 | 31606189 |                | 100306979_TGI_at | BAT1     |
| cg06126421 | -0.0062 | 0.0053 | 2.43E-01 | 1          | 6          | 30720080 | 30728885 |                | 100131277_TGI_at | DHX16    |
| cg06126421 | -0.0116 | 0.0101 | 2.51E-01 | 1          | 6          | 30720080 | 31356094 |                | 100139476_TGI_at |          |
| cg06126421 | -0.0153 | 0.0137 | 2.62E-01 | 1          | 6          | 30720080 | 30800255 |                | 100307304_TGI_at | FLOT1    |
| cg06126421 | -0.0096 | 0.0088 | 2.74E-01 | 1          | 6          | 30720080 | 31186980 |                | 100155167_TGI_at | C6orf15  |
| cg06126421 | -0.0191 | 0.0175 | 2.75E-01 | 1          | 6          | 30720080 | 31270960 |                | 100311757_TGI_at |          |
| cg06126421 | -0.0125 | 0.0115 | 2.78E-01 | 1          | 6          | 30720080 | 30817375 |                | 100313972_TGI_at | FLOT1    |
| cg06126421 | -0.0098 | 0.0091 | 2.82E-01 | 1          | 6          | 30720080 | 30803491 |                | 100156505_TGI_at | FLOT1    |
| cg06126421 | -0.0203 | 0.0189 | 2.84E-01 | 1          | 6          | 30720080 | 31620220 |                | 100142732_TGI_at | ATP6V1G2 |
| cg06126421 | -0.0118 | 0.0112 | 2.92E-01 | 1          | 6          | 30720080 | 30137014 |                | 100158228_TGI_at | ZNRD1    |
| cg06126421 | -0.0060 | 0.0058 | 2.98E-01 | 1          | 6          | 30720080 | 30465971 |                | 100152513_TGI_at |          |
| cg06126421 | -0.0103 | 0.0100 | 3.02E-01 | 1          | 6          | 30720080 | 30815953 |                | 100308169_TGI_at | FLOT1    |
| cg06126421 | 0.0059  | 0.0057 | 3.03E-01 | 1          | 6          | 30720080 | 31344828 |                | 100313121_TGI_at | HLA-C    |
| cg06126421 | -0.0133 | 0.0129 | 3.05E-01 | 1          | 6          | 30720080 | 30817013 |                | 100304636_TGI_at | FLOT1    |
| cg06126421 | 0.0057  | 0.0057 | 3.18E-01 | 1          | 6          | 30720080 | 31429875 |                | 100300038_TGI_at | HLA-B    |
| cg06126421 | -0.0102 | 0.0112 | 3.64E-01 | 1          | 6          | 30720080 | 30989960 |                | 100151371_TGI_at | VARS2    |
| cg06126421 | -0.0092 | 0.0106 | 3.89E-01 | 1          | 6          | 30720080 | 31604717 |                | 100147446_TGI_at | MCCD1    |
| cg06126421 | 0.0071  | 0.0085 | 4.01E-01 | 1          | 6          | 30720080 | 30723176 |                | 100153402_TGI_at | C6orf136 |
| cg06126421 | -0.0056 | 0.0068 | 4.05E-01 | 1          | 6          | 30720080 | 30239440 |                | 100149405_TGI_at | TRIM15   |
| cg06126421 | 0.0077  | 0.0093 | 4.11E-01 | 1          | 6          | 30720080 | 31344508 |                | 100302942_TGI_at | HLA-C    |
| cg06126421 | -0.0085 | 0.0108 | 4.35E-01 | 1          | 6          | 30720080 | 31698835 |                | 100155673_TGI_at | SNORA38  |
| cg06126421 | -0.0333 | 0.0429 | 4.37E-01 | 1          | 6          | 30720080 | 29748256 |                | 100303994_TGI_at | ZFP57    |
| cg06126421 | -0.0074 | 0.0097 | 4.43E-01 | 1          | 6          | 30720080 | 30260212 |                | 100126192_TGI_at | TRIM26   |
| cg06126421 | -0.0069 | 0.0092 | 4.56E-01 | 1          | 6          | 30720080 | 31696575 |                | 100302712_TGI_at | BAT2     |
| cg06126421 | -0.0072 | 0.0099 | 4.63E-01 | 1          | 6          | 30720080 | 31696428 |                | 100139818_TGI_at | BAT2     |
| cg06126421 | 0.0187  | 0.0256 | 4.66E-01 | 1          | 6          | 30720080 | 30082343 |                | 100136412_TGI_at | HLA-G    |
| cg06126421 | -0.0126 | 0.0177 | 4.77E-01 | 1          | 6          | 30720080 | 30676161 |                | 100159380_TGI_at | PPP1R10  |

| CpG name   | Beta    | SE     | P-value  | Bonferroni | Chromosome | bp_meth  | bp_Gene  | Annotation CpG | Probe            | Genename |
|------------|---------|--------|----------|------------|------------|----------|----------|----------------|------------------|----------|
| cg06126421 | -0.0222 | 0.0315 | 4.80E-01 | 1          | 6          | 30720080 | 30818954 |                | 100135011_TGI_at | IER3     |
| cg06126421 | 0.0092  | 0.0132 | 4.87E-01 | 1          | 6          | 30720080 | 30081147 |                | 100125007_TGI_at | C6orf12  |
| cg06126421 | 0.0058  | 0.0083 | 4.88E-01 | 1          | 6          | 30720080 | 31344506 |                | 100309484_TGI_at | HLA-C    |
| cg06126421 | 0.0049  | 0.0072 | 4.93E-01 | 1          | 6          | 30720080 | 29735073 |                | 100300527_TGI_at | MOG      |
| cg06126421 | -0.0158 | 0.0234 | 4.98E-01 | 1          | 6          | 30720080 | 31190601 |                | 100121628_TGI_at | PSORS1C1 |
| cg06126421 | -0.0065 | 0.0097 | 5.02E-01 | 1          | 6          | 30720080 | 30621674 |                | 100149228_TGI_at | GNL1     |
| cg06126421 | -0.0049 | 0.0074 | 5.14E-01 | 1          | 6          | 30720080 | 30226727 |                | 100140268_TGI_at |          |
| cg06126421 | 0.0113  | 0.0175 | 5.18E-01 | 1          | 6          | 30720080 | 30000478 |                | 100123483_TGI_at | HCG4P6   |
| cg06126421 | 0.0031  | 0.0049 | 5.18E-01 | 1          | 6          | 30720080 | 30018309 |                | 100129349_TGI_at | HLA-A    |
| cg06126421 | -0.0051 | 0.0079 | 5.20E-01 | 1          | 6          | 30720080 | 29732787 |                | 100137900_TGI_at | MOG      |
| cg06126421 | 0.0053  | 0.0087 | 5.48E-01 | 1          | 6          | 30720080 | 30178654 |                | 100155181_TGI_at | TRIM31   |
| cg06126421 | -0.0055 | 0.0099 | 5.79E-01 | 1          | 6          | 30720080 | 29826321 |                | 100304754_TGI_at |          |
| cg06126421 | 0.0061  | 0.0113 | 5.87E-01 | 1          | 6          | 30720080 | 30367388 |                | 100308127_TGI_at | HCG18    |
| cg06126421 | 0.0047  | 0.0088 | 5.93E-01 | 1          | 6          | 30720080 | 30147130 |                | 100312608_TGI_at | RNF39    |
| cg06126421 | -0.0032 | 0.0064 | 6.15E-01 | 1          | 6          | 30720080 | 31213289 |                | 100124666_TGI_at | PSORS1C2 |
| cg06126421 | -0.0032 | 0.0064 | 6.16E-01 | 1          | 6          | 30720080 | 31691277 |                | 100140033_TGI_at | AIF1     |
| cg06126421 | 0.0081  | 0.0164 | 6.21E-01 | 1          | 6          | 30720080 | 31648071 |                | 100162143_TGI_at | LTA      |
| cg06126421 | -0.0057 | 0.0116 | 6.26E-01 | 1          | 6          | 30720080 | 30366765 |                | 100131217_TGI_at | HCG18    |
| cg06126421 | 0.0034  | 0.0075 | 6.56E-01 | 1          | 6          | 30720080 | 31190505 |                | 100306170_TGI_at | PSORS1C1 |
| cg06126421 | -0.0087 | 0.0199 | 6.64E-01 | 1          | 6          | 30720080 | 31027537 |                | 100156384_TGI_at | DPCR1    |
| cg06126421 | -0.0044 | 0.0113 | 6.94E-01 | 1          | 6          | 30720080 | 31234303 |                | 100142285_TGI_at | TCF19    |
| cg06126421 | 0.0041  | 0.0131 | 7.55E-01 | 1          | 6          | 30720080 | 30376549 |                | 100128261_TGI_at |          |
| cg06126421 | 0.0058  | 0.0189 | 7.61E-01 | 1          | 6          | 30720080 | 30087854 |                | 100138253_TGI_at | HCG8     |
| cg06126421 | 0.0039  | 0.0129 | 7.64E-01 | 1          | 6          | 30720080 | 30367130 |                | 100139688_TGI_at | HCG18    |
| cg06126421 | 0.0021  | 0.0076 | 7.81E-01 | 1          | 6          | 30720080 | 31129962 |                | 100129279_TGI_at | HCG22    |
| cg06126421 | -0.0018 | 0.0067 | 7.84E-01 | 1          | 6          | 30720080 | 30702641 |                | 100126300_TGI_at | C6orf134 |
| cg06126421 | -0.0041 | 0.0149 | 7.85E-01 | 1          | 6          | 30720080 | 30227705 |                | 100133405_TGI_at | TRIM10   |
| cg06126421 | -0.0030 | 0.0112 | 7.93E-01 | 1          | 6          | 30720080 | 30752144 |                | 100158540_TGI_at | KIAA1949 |
| cg06126421 | 0.0015  | 0.0057 | 7.99E-01 | 1          | 6          | 30720080 | 30775562 |                | 100302297_TGI_at | MDC1     |
| cg06126421 | -0.0054 | 0.0212 | 7.99E-01 | 1          | 6          | 30720080 | 31190848 |                | 100303039_TGI_at | CDSN     |
| cg06126421 | 0.0017  | 0.0069 | 8.05E-01 | 1          | 6          | 30720080 | 30260576 |                | 100158973_TGI_at |          |
| cg06126421 | 0.0051  | 0.0229 | 8.23E-01 | 1          | 6          | 30720080 | 29950912 |                | 100310523_TGI_at |          |

| CpG name   | Beta    | SE     | P-value  | Bonferroni | Chromosome | bp_meth  | bp_Gene  | Annotation CpG | Probe            | Genename |
|------------|---------|--------|----------|------------|------------|----------|----------|----------------|------------------|----------|
| cg06126421 | 0.0021  | 0.0105 | 8.42E-01 | 1          | 6          | 30720080 | 31695126 |                | 100162932_TGI_at |          |
| cg06126421 | 0.0042  | 0.0216 | 8.44E-01 | 1          | 6          | 30720080 | 31476834 |                | 100305045_TGI_at |          |
| cg06126421 | -0.0040 | 0.0216 | 8.55E-01 | 1          | 6          | 30720080 | 31656316 |                | 100154387_TGI_at | LTB      |
| cg06126421 | 0.0012  | 0.0069 | 8.59E-01 | 1          | 6          | 30720080 | 30772681 |                | 100144058_TGI_at |          |
| cg06126421 | -0.0049 | 0.0304 | 8.71E-01 | 1          | 6          | 30720080 | 29974792 |                | 100143227_TGI_at | HCG2P7   |
| cg06126421 | -0.0015 | 0.0093 | 8.72E-01 | 1          | 6          | 30720080 | 30702631 |                | 100142981_TGI_at | C6orf134 |
| cg06126421 | 0.0034  | 0.0232 | 8.84E-01 | 1          | 6          | 30720080 | 31476834 |                | 100162706_TGI_at |          |
| cg06126421 | 0.0038  | 0.0262 | 8.84E-01 | 1          | 6          | 30720080 | 31651328 |                | 100145785_TGI_at | TNF      |
| cg06126421 | 0.0009  | 0.0061 | 8.87E-01 | 1          | 6          | 30720080 | 30403018 |                | 100127148_TGI_at | TRIM39   |
| cg06126421 | -0.0014 | 0.0102 | 8.88E-01 | 1          | 6          | 30720080 | 30200931 |                | 100159888_TGI_at |          |
| cg06126421 | -0.0010 | 0.0073 | 8.90E-01 | 1          | 6          | 30720080 | 31620936 |                | 100308499_TGI_at | ATP6V1G2 |
| cg06126421 | 0.0016  | 0.0123 | 8.94E-01 | 1          | 6          | 30720080 | 30076768 |                | 100145634_TGI_at | C6orf12  |
| cg06126421 | -0.0033 | 0.0260 | 9.00E-01 | 1          | 6          | 30720080 | 29974792 |                | 100300348_TGI_at | HCG2P7   |
| cg06126421 | 0.0006  | 0.0053 | 9.04E-01 | 1          | 6          | 30720080 | 30227702 |                | 100161677_TGI_at | TRIM10   |
| cg06126421 | -0.0010 | 0.0129 | 9.41E-01 | 1          | 6          | 30720080 | 31138975 |                | 100123551_TGI_at |          |
| cg06126421 | 0.0008  | 0.0110 | 9.41E-01 | 1          | 6          | 30720080 | 30147130 |                | 100142468_TGI_at | RNF39    |
| cg06126421 | -0.0009 | 0.0140 | 9.48E-01 | 1          | 6          | 30720080 | 30019070 |                | 100303756_TGI_at | HLA-A    |
| cg06126421 | 0.0002  | 0.0056 | 9.74E-01 | 1          | 6          | 30720080 | 30562121 |                | 100142450_TGI_at |          |
| cg06126421 | -0.0002 | 0.0133 | 9.89E-01 | 1          | 6          | 30720080 | 30335352 |                | 100137319_TGI_at |          |
| cg21161138 | -0.0197 | 0.0099 | 4.62E-02 | 1          | 5          | 399360   | 1278469  | AHRR           | 100144282_TGI_at | SLC6A18  |
| cg21161138 | -0.0133 | 0.0067 | 4.93E-02 | 1          | 5          | 399360   | 654859   | AHRR           | 100152132_TGI_at |          |
| cg21161138 | -0.0126 | 0.0069 | 6.97E-02 | 1          | 5          | 399360   | 1272703  | AHRR           | 100124001_TGI_at | SLC6A19  |
| cg21161138 | -0.0138 | 0.0078 | 7.83E-02 | 1          | 5          | 399360   | 1306286  | AHRR           | 100144642_TGI_at | TERT     |
| cg21161138 | -0.0617 | 0.0410 | 1.32E-01 | 1          | 5          | 399360   | 1226255  | AHRR           | 100311848_TGI_at |          |
| cg21161138 | 0.0263  | 0.0175 | 1.33E-01 | 1          | 5          | 399360   | 257874   | AHRR           | 100127701_TGI_at | CCDC127  |
| cg21161138 | 0.0237  | 0.0167 | 1.57E-01 | 1          | 5          | 399360   | 258073   | AHRR           | 100311673_TGI_at | CCDC127  |
| cg21161138 | -0.0122 | 0.0088 | 1.64E-01 | 1          | 5          | 399360   | 193372   | AHRR           | 100138179_TGI_at | PLEKHG4B |
| cg21161138 | 0.0429  | 0.0327 | 1.89E-01 | 1          | 5          | 399360   | 763474   | AHRR           | 100300181_TGI_at | ZDHHC11  |
| cg21161138 | -0.0111 | 0.0087 | 2.03E-01 | 1          | 5          | 399360   | 1057830  | AHRR           | 100162877_TGI_at |          |
| cg21161138 | -0.0113 | 0.0089 | 2.04E-01 | 1          | 5          | 399360   | 248892   | AHRR           | 100148989_TGI_at |          |
| cg21161138 | 0.0373  | 0.0296 | 2.08E-01 | 1          | 5          | 399360   | 946003   | AHRR           | 100151667_TGI_at | TRIP13   |
| cg21161138 | -0.0094 | 0.0075 | 2.12E-01 | 1          | 5          | 399360   | 277519   | AHRR           | 100304547_TGI_at | SDHA     |



| CpG name   | Beta    | SE     | P-value  | Bonferroni | Chromosome | bp_meth | bp_Gene | Annotation CpG | Probe            | Genename |
|------------|---------|--------|----------|------------|------------|---------|---------|----------------|------------------|----------|
| cg21161138 | -0.0113 | 0.0093 | 2.28E-01 | 1          | 5          | 399360  | 193680  | AHRR           | 100155610_TGI_at | PLEKHG4B |
| cg21161138 | -0.0094 | 0.0082 | 2.53E-01 | 1          | 5          | 399360  | 357298  | AHRR           | 100162325_TGI_at | AHRR     |
| cg21161138 | -0.0095 | 0.0083 | 2.56E-01 | 1          | 5          | 399360  | 923403  | AHRR           | 100310904_TGI_at | BRD9     |
| cg21161138 | -0.0102 | 0.0095 | 2.79E-01 | 1          | 5          | 399360  | 420579  | AHRR           | 100132989_TGI_at | AHRR     |
| cg21161138 | -0.0107 | 0.0103 | 2.98E-01 | 1          | 5          | 399360  | 495578  | AHRR           | 100146413_TGI_at |          |
| cg21161138 | -0.0187 | 0.0186 | 3.14E-01 | 1          | 5          | 399360  | 944761  | AHRR           | 100304823_TGI_at | BRD9     |
| cg21161138 | 0.0340  | 0.0351 | 3.32E-01 | 1          | 5          | 399360  | 848721  | AHRR           | 100133783_TGI_at | ZDHHC11  |
| cg21161138 | 0.0097  | 0.0103 | 3.48E-01 | 1          | 5          | 399360  | 1103488 | AHRR           | 100126447_TGI_at | SLC12A7  |
| cg21161138 | 0.0095  | 0.0104 | 3.56E-01 | 1          | 5          | 399360  | 327872  | AHRR           | 100312117_TGI_at | PDCD6    |
| cg21161138 | -0.0092 | 0.0102 | 3.66E-01 | 1          | 5          | 399360  | 244625  | AHRR           | 100123951_TGI_at |          |
| cg21161138 | 0.0239  | 0.0268 | 3.73E-01 | 1          | 5          | 399360  | 713890  | AHRR           | 100313551_TGI_at | TPPP     |
| cg21161138 | 0.0131  | 0.0166 | 4.29E-01 | 1          | 5          | 399360  | 237421  | AHRR           | 100126945_TGI_at | PLEKHG4B |
| cg21161138 | 0.0114  | 0.0151 | 4.47E-01 | 1          | 5          | 399360  | 523626  | AHRR           | 100304150_TGI_at |          |
| cg21161138 | -0.0131 | 0.0179 | 4.65E-01 | 1          | 5          | 399360  | 1062167 | AHRR           | 100154736_TGI_at | NKD2     |
| cg21161138 | 0.0170  | 0.0239 | 4.78E-01 | 1          | 5          | 399360  | 713890  | AHRR           | 100144166_TGI_at | TPPP     |
| cg21161138 | -0.0055 | 0.0079 | 4.84E-01 | 1          | 5          | 399360  | 1370867 | AHRR           | 100309906_TGI_at | CLPTM1L  |
| cg21161138 | 0.0045  | 0.0067 | 5.02E-01 | 1          | 5          | 399360  | 513536  | AHRR           | 100131916_TGI_at |          |
| cg21161138 | -0.0045 | 0.0068 | 5.03E-01 | 1          | 5          | 399360  | 324777  | AHRR           | 100305370_TGI_at | PDCD6    |
| cg21161138 | -0.0071 | 0.0108 | 5.10E-01 | 1          | 5          | 399360  | 1163893 | AHRR           | 100129229_TGI_at |          |
| cg21161138 | -0.0109 | 0.0167 | 5.14E-01 | 1          | 5          | 399360  | 136266  | AHRR           | 100158534_TGI_at |          |
| cg21161138 | 0.0094  | 0.0153 | 5.37E-01 | 1          | 5          | 399360  | 237421  | AHRR           | 100306701_TGI_at | PLEKHG4B |
| cg21161138 | -0.0106 | 0.0174 | 5.42E-01 | 1          | 5          | 399360  | 1062076 | AHRR           | 100309999_TGI_at | NKD2     |
| cg21161138 | -0.0057 | 0.0098 | 5.62E-01 | 1          | 5          | 399360  | 327872  | AHRR           | 100131641_TGI_at | PDCD6    |
| cg21161138 | -0.0051 | 0.0088 | 5.63E-01 | 1          | 5          | 399360  | 1370999 | AHRR           | 100133970_TGI_at | CLPTM1L  |
| cg21161138 | -0.0037 | 0.0066 | 5.74E-01 | 1          | 5          | 399360  | 526424  | AHRR           | 100150375_TGI_at | SLC9A3   |
| cg21161138 | -0.0034 | 0.0072 | 6.38E-01 | 1          | 5          | 399360  | 271355  | AHRR           | 100302759_TGI_at | SDHA     |
| cg21161138 | -0.0088 | 0.0192 | 6.46E-01 | 1          | 5          | 399360  | 532246  | AHRR           | 100123914_TGI_at |          |
| cg21161138 | -0.0031 | 0.0080 | 6.98E-01 | 1          | 5          | 399360  | 1032479 | AHRR           | 100153219_TGI_at |          |
| cg21161138 | 0.0044  | 0.0124 | 7.25E-01 | 1          | 5          | 399360  | 523626  | AHRR           | 100141396_TGI_at |          |
| cg21161138 | 0.0026  | 0.0075 | 7.26E-01 | 1          | 5          | 399360  | 665404  | AHRR           | 100151246_TGI_at | CEP72    |
| cg21161138 | 0.0068  | 0.0226 | 7.64E-01 | 1          | 5          | 399360  | 254500  | AHRR           | 100142366_TGI_at |          |
| cg21161138 | 0.0023  | 0.0085 | 7.87E-01 | 1          | 5          | 399360  | 525126  | AHRR           | 100307857_TGI_at |          |

| CpG name   | Beta    | SE     | P-value  | Bonferroni | Chromosome | bp_meth   | bp_Gene   | Annotation CpG | Probe            | Genename |
|------------|---------|--------|----------|------------|------------|-----------|-----------|----------------|------------------|----------|
| cg21161138 | 0.0024  | 0.0096 | 8.05E-01 | 1          | 5          | 399360    | 849287    | AHRR           | 100307772_TGI_at | ZDHC11   |
| cg21161138 | -0.0028 | 0.0160 | 8.62E-01 | 1          | 5          | 399360    | 1277671   | AHRR           | 100125947_TGI_at | SLC6A19  |
| cg21161138 | -0.0011 | 0.0069 | 8.74E-01 | 1          | 5          | 399360    | 1254765   | AHRR           | 100140783_TGI_at | SLC6A19  |
| cg21161138 | -0.0010 | 0.0076 | 8.95E-01 | 1          | 5          | 399360    | 1254709   | AHRR           | 100125143_TGI_at | SLC6A19  |
| cg21161138 | -0.0006 | 0.0091 | 9.48E-01 | 1          | 5          | 399360    | 496333    | AHRR           | 100137677_TGI_at | EXOC3    |
| cg21566642 | -0.0328 | 0.0149 | 2.81E-02 | 1          | 2          | 233284661 | 233443237 |                | 100148559_TGI_at | C2orf82  |
| cg21566642 | -0.0184 | 0.0086 | 3.21E-02 | 1          | 2          | 233284661 | 232959742 |                | 100124762_TGI_at | ECEL1P2  |
| cg21566642 | 0.0369  | 0.0193 | 5.66E-02 | 1          | 2          | 233284661 | 233742741 |                | 100123878_TGI_at | INPP5D   |
| cg21566642 | 0.0149  | 0.0079 | 6.02E-02 | 1          | 2          | 233284661 | 233405810 |                | 100124019_TGI_at | GIGYF2   |
| cg21566642 | 0.0286  | 0.0177 | 1.07E-01 | 1          | 2          | 233284661 | 233633311 |                | 100157967_TGI_at | INPP5D   |
| cg21566642 | -0.0129 | 0.0083 | 1.20E-01 | 1          | 2          | 233284661 | 233448752 |                | 100133682_TGI_at | C2orf82  |
| cg21566642 | -0.0202 | 0.0133 | 1.28E-01 | 1          | 2          | 233284661 | 232990987 |                | 100146285_TGI_at |          |
| cg21566642 | -0.0165 | 0.0113 | 1.43E-01 | 1          | 2          | 233284661 | 233029076 |                | 100157259_TGI_at | ALPI     |
| cg21566642 | 0.0169  | 0.0117 | 1.49E-01 | 1          | 2          | 233284661 | 233112680 |                | 100161148_TGI_at | CHRNA1   |
| cg21566642 | -0.0204 | 0.0153 | 1.82E-01 | 1          | 2          | 233284661 | 232979795 |                | 100142619_TGI_at | ALPL2    |
| cg21566642 | -0.0253 | 0.0190 | 1.83E-01 | 1          | 2          | 233284661 | 233254953 |                | 100303862_TGI_at | EFHD1    |
| cg21566642 | -0.0132 | 0.0100 | 1.84E-01 | 1          | 2          | 233284661 | 232925503 |                | 100157308_TGI_at |          |
| cg21566642 | -0.0130 | 0.0100 | 1.93E-01 | 1          | 2          | 233284661 | 233108610 |                | 100159750_TGI_at | CHRNA1   |
| cg21566642 | -0.0094 | 0.0082 | 2.55E-01 | 1          | 2          | 233284661 | 233033426 |                | 100130494_TGI_at |          |
| cg21566642 | -0.0195 | 0.0173 | 2.59E-01 | 1          | 2          | 233284661 | 233123601 |                | 100127022_TGI_at | EIF4E2   |
| cg21566642 | 0.0161  | 0.0155 | 2.98E-01 | 1          | 2          | 233284661 | 234058990 |                | 100135825_TGI_at | USP40    |
| cg21566642 | 0.0202  | 0.0197 | 3.05E-01 | 1          | 2          | 233284661 | 233270258 |                | 100302206_TGI_at | GIGYF2   |
| cg21566642 | 0.0161  | 0.0165 | 3.28E-01 | 1          | 2          | 233284661 | 233276374 |                | 100304412_TGI_at | GIGYF2   |
| cg21566642 | 0.0145  | 0.0149 | 3.32E-01 | 1          | 2          | 233284661 | 233633279 |                | 100149718_TGI_at | INPP5D   |
| cg21566642 | -0.0090 | 0.0095 | 3.41E-01 | 1          | 2          | 233284661 | 233605625 |                | 100125390_TGI_at | NEU2     |
| cg21566642 | -0.0148 | 0.0157 | 3.46E-01 | 1          | 2          | 233284661 | 232359387 |                | 100312114_TGI_at | COPS7B   |
| cg21566642 | 0.0138  | 0.0149 | 3.57E-01 | 1          | 2          | 233284661 | 233633311 |                | 100300545_TGI_at | INPP5D   |
| cg21566642 | -0.0144 | 0.0158 | 3.62E-01 | 1          | 2          | 233284661 | 233451639 |                | 100138454_TGI_at | NGEF     |
| cg21566642 | -0.0449 | 0.0498 | 3.67E-01 | 1          | 2          | 233284661 | 232951591 |                | 100302996_TGI_at | ALPP     |
| cg21566642 | -0.0096 | 0.0123 | 4.35E-01 | 1          | 2          | 233284661 | 233881206 |                | 100127704_TGI_at | SAG      |
| cg21566642 | -0.0088 | 0.0115 | 4.45E-01 | 1          | 2          | 233284661 | 233099165 |                | 100161687_TGI_at | CHRNA1   |
| cg21566642 | 0.0126  | 0.0177 | 4.79E-01 | 1          | 2          | 233284661 | 233270284 |                | 100142158_TGI_at | GIGYF2   |

| CpG name   | Beta    | SE     | P-value  | Bonferroni | Chromosome | bp_meth   | bp_Gene   | Annotation CpG | Probe            | Genename |
|------------|---------|--------|----------|------------|------------|-----------|-----------|----------------|------------------|----------|
| cg21566642 | -0.0078 | 0.0114 | 4.95E-01 | 1          | 2          | 233284661 | 233052780 |                | 100151962_TGI_at | ECEL1    |
| cg21566642 | 0.0130  | 0.0197 | 5.09E-01 | 1          | 2          | 233284661 | 232534637 |                | 100162400_TGI_at | DIS3L2   |
| cg21566642 | 0.0141  | 0.0303 | 6.43E-01 | 1          | 2          | 233284661 | 232382799 |                | 100153985_TGI_at |          |
| cg21566642 | -0.0045 | 0.0109 | 6.83E-01 | 1          | 2          | 233284661 | 232498378 |                | 100144674_TGI_at | NPPC     |
| cg21566642 | -0.0047 | 0.0121 | 7.01E-01 | 1          | 2          | 233284661 | 234048904 |                | 100302018_TGI_at | USP40    |
| cg21566642 | -0.0073 | 0.0214 | 7.32E-01 | 1          | 2          | 233284661 | 233339103 |                | 100153794_TGI_at | KCNJ13   |
| cg21566642 | -0.0091 | 0.0308 | 7.68E-01 | 1          | 2          | 233284661 | 233121022 |                | 100301223_TGI_at | TIGD1    |
| cg21566642 | -0.0027 | 0.0108 | 8.02E-01 | 1          | 2          | 233284661 | 233901986 |                | 100306256_TGI_at | SAG      |
| cg21566642 | 0.0025  | 0.0106 | 8.11E-01 | 1          | 2          | 233284661 | 232359405 |                | 100124382_TGI_at | COPS7B   |
| cg21566642 | 0.0032  | 0.0165 | 8.44E-01 | 1          | 2          | 233284661 | 233927891 |                | 100131135_TGI_at | DGKD     |
| cg21566642 | 0.0021  | 0.0113 | 8.53E-01 | 1          | 2          | 233284661 | 233123600 |                | 100129016_TGI_at | EIF4E2   |
| cg21566642 | 0.0017  | 0.0093 | 8.56E-01 | 1          | 2          | 233284661 | 233123639 |                | 100308088_TGI_at | EIF4E2   |
| cg21566642 | -0.0037 | 0.0263 | 8.89E-01 | 1          | 2          | 233284661 | 233121022 |                | 100134110_TGI_at | TIGD1    |
| cg21566642 | 0.0016  | 0.0140 | 9.10E-01 | 1          | 2          | 233284661 | 233139867 |                | 100305783_TGI_at | EIF4E2   |
| cg21566642 | -0.0012 | 0.0107 | 9.12E-01 | 1          | 2          | 233284661 | 234048910 |                | 100128277_TGI_at |          |
| cg21566642 | 0.0011  | 0.0163 | 9.45E-01 | 1          | 2          | 233284661 | 233633279 |                | 100308965_TGI_at | INPP5D   |
| cg21566642 | -0.0007 | 0.0102 | 9.47E-01 | 1          | 2          | 233284661 | 233093416 |                | 100142878_TGI_at |          |
| cg21566642 | -0.0007 | 0.0122 | 9.52E-01 | 1          | 2          | 233284661 | 233123600 |                | 100302691_TGI_at | EIF4E2   |
| cg21566642 | 0.0004  | 0.0092 | 9.69E-01 | 1          | 2          | 233284661 | 233585567 |                | 100128184_TGI_at |          |
| cg21566642 | 0.0008  | 0.0261 | 9.76E-01 | 1          | 2          | 233284661 | 234041030 |                | 100134859_TGI_at | DGKD     |
